## Basal-to-classical phenotypic switch of pancreatic cancer cells upon integration into the duodenal epithelium

Benedek Bozóky<sup>1,2,#</sup>, Carlos Fernández Moro<sup>3,4</sup>, Carina Strell<sup>5,6</sup>, Ingemar Ernberg<sup>2</sup>, Laszlo Szekely<sup>3,4</sup>, Marco Gerling<sup>1,7,#,\*</sup> and Béla Bozóky<sup>3,\*</sup>

Addresses:

1. Theme Cancer, oncology, Karolinska University Hospital, 17 176 Solna, Sweden
2. Department of Microbiology, Tumor, and Cell Biology, Karolinska Institutet, Solnavägen 9, 171 65 Solna, Sweden
3. Department of Clinical Pathology/Cytology, Karolinska University Hospital, Stockholm, 14186, Sweden
4. Department of Laboratory Medicine, Division of Pathology, Karolinska Institutet, 14186 Stockholm, Sweden
5. Department of Oncology-Pathology, Karolinska Institutet, 17164 Solna, Sweden
6. Department of Immunology, Genetics and Pathology, Uppsala University, 75185 Uppsala, Sweden
7. Department of Biosciences and Nutrition, Karolinska Institutet, 14183 Huddinge, Sweden

#To whom correspondence should be addressed:

**Dr. med. Marco Gerling**

Karolinska Institutet  
Department of Biosciences and Nutrition  
Hälsövägen 7  
141 83 Huddinge  
Sweden  
[marco.gerling@ki.se](mailto:marco.gerling@ki.se)

Benedek Bozóky  
Nobels väg 16,  
Karolinska Institutet, Campus Solna  
Box 280  
171 77 Stockholm  
Sweden  
[benedek.bozoky@ki.se](mailto:benedek.bozoky@ki.se)

\* shared authorship

**Conflicts of Interest:** The authors declare that no conflicts of interest exist.

**Author contributions:** Benedek B, Béla B, MG, CF, and CS generated and analyzed data, LS and IE advised on study design, Béla B conceived the study, Benedek B, CFM and MG wrote the manuscript, CS, IE, and LS commented on the manuscript.

## Abstract

Pancreatic ductal adenocarcinoma (PDAC) is one of the most aggressive solid tumors. Based on transcriptomic classifiers, basal-like and classical PDAC subtypes can be defined that differ in prognosis. Single-cell sequencing has recently revealed that these subtypes coexist in individual tumors. However, the contribution of either clonal heterogeneity or microenvironmental cues to subtype heterogeneity is unclear. Here, we report the tumor phenotype dynamics in a cohort of patients in whom PDAC infiltrated the duodenal wall. Using multiplex immunohistochemistry, we show that PDAC cells revert to non-destructive growth and undergo differentiation towards the classical subtype upon integration into the duodenal epithelium. Our results tightly link microenvironmental cues to the PDAC molecular subtype and open the door to a systematic investigation of microenvironmental control in human pancreatic cancer.

## Main

### Introduction

Pancreatic ductal adenocarcinoma (PDAC) is one of the most lethal tumors with a five-year survival rate of less than 9% (1). Although clinically perceived as uniformly aggressive, PDAC subtypes can be defined based on transcriptional profiling (2–6). Most classifications, including the most recent one, distinguish classical from basal-like tumor subtypes, although other subtypes and intermediate states exist (2). Basal-like tumors are uniformly associated with an inferior prognosis (2–4, 6). While subtyping based on bulk transcriptomic data is prognostically valuable, both basal-like and classical cells exist in individual tumors, as revealed by single-cell RNA sequencing (2). Genetic changes, such as allelic imbalances of mutant *KRAS*, contribute to this intratumor heterogeneity (2, 7); however, mouse models have demonstrated a central role for the microenvironment in shaping the PDAC tumor cell phenotype (8), and there is a strong support from experimental studies that the non-malignant microenvironment can reprogram malignant cells to a normal-like behavior, associated with tumor cell differentiation (9, 10). In human PDAC, cancer cell states have recently been linked to adjacent fibroblast subtypes (11); nevertheless, the full extent to which microenvironmental cues shape tumor cell phenotypes remains unclear, and the forces driving tumor cell heterogeneity have not been well defined.

Morphological heterogeneity of pancreatic tumors is regularly observed during routine pathological assessment, which is the main pillar of PDAC diagnosis (12). Based on histopathology, it has previously been reported that PDAC cancer cells can appear more differentiated upon entering the duodenum, which occasionally leads to misdiagnosis of PDAC as an intestinal neoplasm (13). From a tumor biology perspective, these striking phenotypical changes in tumor cells upon switching location provide a remarkable, yet largely overlooked, possibility of studying cancer cell plasticity in relation to microenvironmental cues within spatially defined tissue compartments in humans.

Here, we set out to systematically map the tumor cell phenotype dynamics in a unique cohort of PDAC patients with duodenal tumor infiltration. We find that PDAC cells revert to non-destructive growth and undergo classical/intestinal differentiation upon integration into the duodenal epithelium. Our results link the intestinal microenvironment to defined shifts in the PDAC cancer cell phenotype.

## Results

We studied  $n = 20$  patients with infiltration of PDAC cells through the duodenal wall and into the intestinal epithelium. We observed consistent morphological changes in areas of PDAC integration into the epithelial layer (**Figure 1A**). The mucosal architecture was strikingly preserved, and the epithelial lining exhibited either normal morphology or mild reactive atypia, interspersed with areas of columnar epithelium with a dysplastic/neoplastic appearance. To confirm unequivocally that the neoplastic cells in the duodenal mucosa were of pancreatic origin, rather than reactive intestinal cells secondary to PDAC infiltration into the submucosa, we used two independent immunohistochemical markers, SMAD4 and p53; SMAD4 is lost in approximately half of all pancreatic cancer cases (14); while *TP53* mutations, which lead to accumulation of mutant p53 protein, are detectable in 50% of patients, independently of alterations in *SMAD4* (14). Both markers confirmed the seamless integration of PDAC cells into the SMAD4<sup>+ve</sup>/p53<sup>-ve/low</sup> duodenal epithelium, without destruction of the mucosal architecture (**Figures 1B&C**). Intramucosal PDAC cells were well differentiated and polarized, in contrast to the submucosa, which harbored pleomorphic cancer cells and irregular glands, consistent with primary PDAC histomorphology (**Figures 1D&E, same tumors as in B&C**).

A hallmark of PDAC is its desmoplastic stroma, in which tumor glands are embedded (11). Notably, IHC for the desmoplasia marker, podoplanin (D2-40), revealed no desmoplasia of the subepithelial stroma adjacent to mucosal cancer cell integration (**Figure 1F**), while desmoplasia was present in the submucosa (**Figure G**). In contrast, expression of CD146 and WT1, markers of the intestinal *lamina propria* (see also *Methods*), was preserved in regions adjacent to intraepithelial tumor cells (**Figures 1H&I**).

There was no difference in overall survival (OS) in our group of 20 patients compared to PDAC patients operated on at the same hospital (15), or to PDAC cases from the TCGA cohort (**Figure 1J**). Hence, the data indicate that duodenal mucosal infiltration does not define a prognostically distinct patient subgroup.

The diverging phenotypes of PDAC cells in mucosal vs. submucosal locations implies a high degree of location-dependency, suggesting that the local microenvironment is a major contributor to the tumor cell phenotype. To quantify these phenotypic changes, we used serial multiplex quantitative immunohistochemistry (smq-IHC) to assess a panel of 12 protein markers, selected to identify tumor cell characteristics, and to approximate the transcriptional subtypes (see also *Methods*) (2). The panel comprised intestinal and pancreatobiliary differentiation markers (CK20, CDX2, MUC2; MUC1, MUC5AC), all of which are included in the classical transcriptional profile (2), a pancreatobiliary marker specific to the basal-like profile (CK17), general markers for PDAC cells (CK7, MUC6) and tumor-specific glycoproteins (CA19-9, CA125, and CEA) together with Ki67 to assess proliferation.

In agreement with the phenotypic shift, smq-IHC revealed significantly reduced expression of the basal/pancreatobiliary markers, CK17 and CA125, in the mucosa vs. submucosa, while expression of the classical/intestinal markers, MUC5AC, CK20, and MUC2 was increased (**Figures 1K&L**), supporting a strong switch from basal-like towards classical/intestinal differentiation upon intramucosal integration, accompanied by enhanced Ki67 positivity (**Figures 1K&L**).

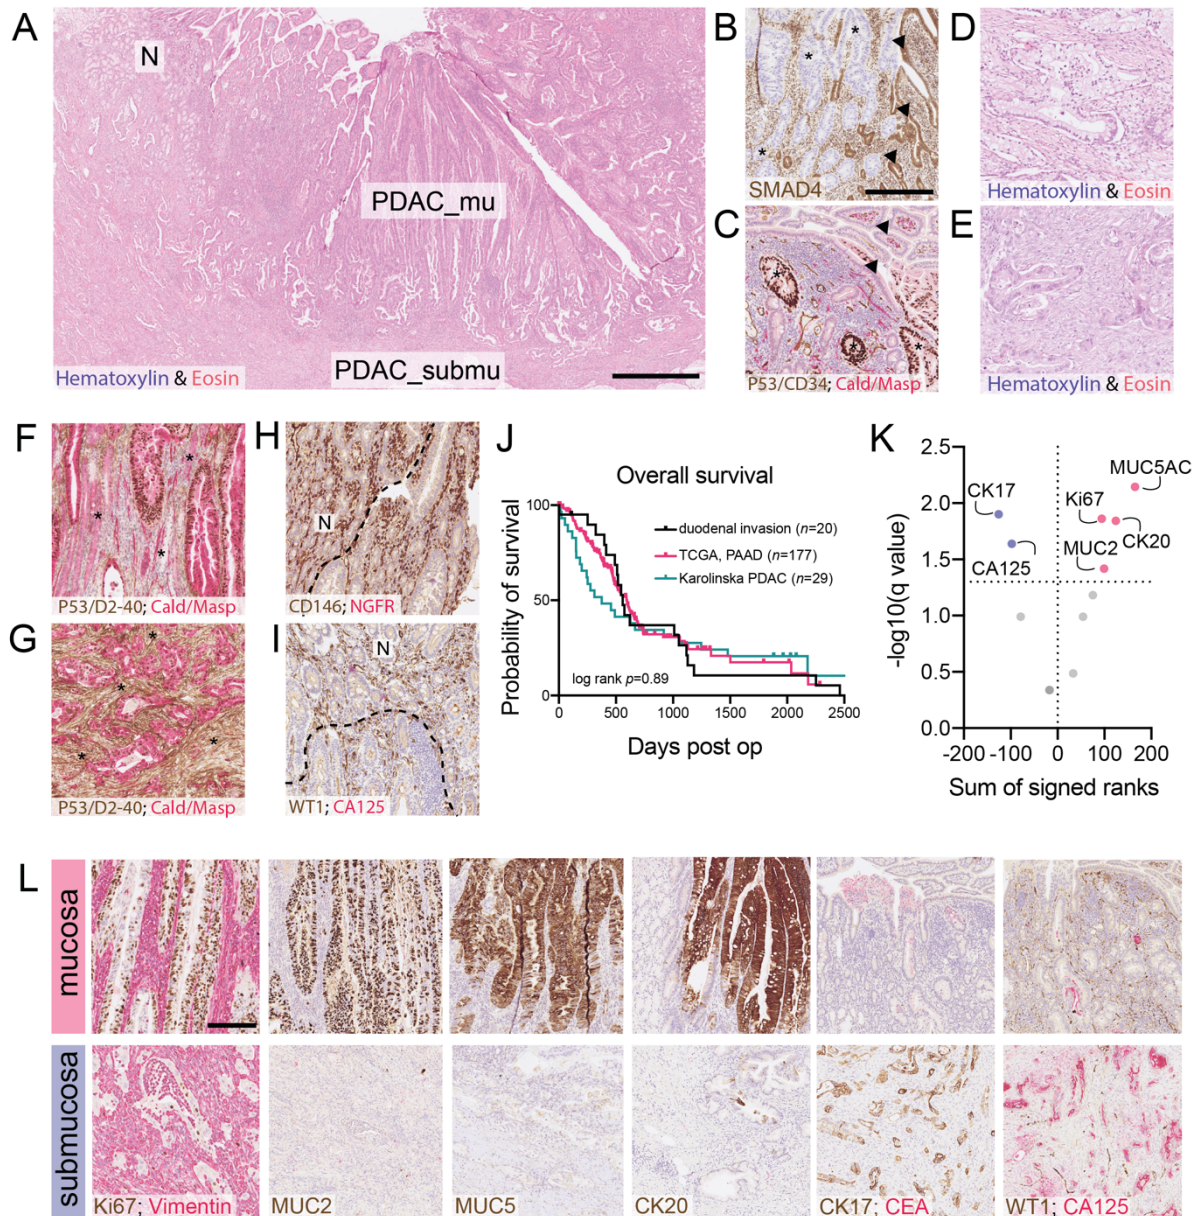

**Figure 1: Pancreatic ductal adenocarcinoma infiltrating the duodenal mucosa.** **A)** Hematoxylin & Eosin (H&E) staining of pancreatic ductal adenocarcinoma (PDAC) cells that have invaded and integrated into the duodenal mucosa. N: non-neoplastic duodenal epithelium, PDAC\_mu: region of PDAC cells within the mucosa, PDAC\_submu: region of PDAC cells in the submucosa. Scale bar: 1 mm. **B)** Representative immunohistochemistry (IHC) for SMAD4 in a PDAC with genetic loss of SMAD4 shows intestinal villi lined by SMAD4-negative PDAC cells (asterisks) compared to adjacent small intestinal epithelial cells positive for SMAD4 expression (arrowheads). Scale bar: 250  $\mu$ m, applies to (B)–(I). All IHC counterstained with Hematoxylin. Multiplex staining combinations are indicated in panels, text color denotes color of chromogen used to visualize protein expression. **C)** Representative image of p53 IHC in a PDAC with accumulation of p53 protein due to TP53 mutation; note regions of p53-positive cells (PDAC cells, asterisks) adjacent to p53-negative cells (intestinal epithelial cells, arrowheads). **D)** and **E)** H&E staining of PDAC cells in the submucosa: (D) is the same tumor as in (B), (E) is the same tumor as in (C). **F)** and **G)** Quadruple IHC for the indicated proteins illustrating D2-40 overexpression as a marker for desmoplasia in the submucosa (G), but absent in the mucosa (F); note that in these quadruple stainings, brown marks both D2-40 (stromal) and p53 (epithelial), and red marks both caldesmon (stromal) and maspin (epithelial); asterisks indicate stroma. **H)** IHC for the lamina propria marker, CD146, shows preserved expression in areas of intraepithelial tumor integration. **I)** IHC for another lamina propria marker, WT1, also shows preserved expression; dotted lines in (H) and (I)

represent approximate border between PDAC cells and enterocytes; (B)–(I) present representative staining of  $n \geq 10$  cases. **J**) Comparison of overall survival in the current cohort of patients with duodenal infiltration vs. patients included in a previously published cohort operated on for PDAC at the same center (15), and vs. patients from The Cancer Genome Atlas (TCGA) PAAD dataset. Initial patient numbers and log-rank  $p$  given in panel. **K**) Volcano plot showing significant findings in red (higher in mucosa) and blue (higher in submucosa out of a total of  $n = 12$  markers included in analysis as indicated in the text. Data based on results from Wilcoxon matched-pairs signed rank test, multiple test correction with two-stage step-up (ref. 16),  $fdr < 0.05$ . **L**) Representative images of the indicated markers showing significant differential expression in mucosal vs. submucosal tumor cells. Scale bar: 250  $\mu\text{m}$ , applies to all images in (L); representative staining of  $n \geq 15$  cases. Note that multiplex IHC was performed for some markers (e.g. Ki67 together with vimentin in the left panel), but not all markers were included in quantitative analysis (see *Methods* for details).

## Discussion

The integration of PDAC cells into the duodenal mucosa leads to a quantifiable phenotypic shift towards intestinal differentiation. Location-dependent morphological changes are accompanied by a loss of basal-like markers in favor of classical markers, corresponding to a switch towards a less aggressive molecular phenotype (2–4, 6). Interestingly, mucosal PDAC cells were cycling (Ki67<sup>+ve</sup>), suggesting the uncoupling of differentiation from proliferation. Together, the data define a real-life endpoint of the phenotypic plasticity of PDAC cells in humans. Although conjectural, they strongly support a model in which basal-like vs. classical tumor subtypes are tightly influenced by microenvironmental cues. The consistency of this phenomenon suggests that this and similar cohorts displaying duodenal invasion can be invaluable for deciphering the molecular underpinnings of PDAC subtype emergence orchestrated by the microenvironment.

## Material and Methods

### *Patients*

Patients were identified by a retrospective search in the pathology archive database of the Karolinska University Hospital, Huddinge, Sweden, and through routine diagnostic pathology. Cases in which infiltration of PDAC cancer cells into the small intestine was described in the pathology report or for which the participating pathologists (CFM, Béla B, LS) noted this phenomenon were selected and systematically reassessed based on available Hematoxylin and Eosin staining and routine immunohistochemistry (IHC). Patients operated on between 2008 and 2020 were considered. Clinical data were obtained by retrospective chart review. A total of  $n = 20$  patients in whom PDAC cells had infiltrated the entire thickness of the duodenal

wall were included. All patients (n = 8 females, n = 12 males, aged 64–82 years, median age 71.8 years) underwent resection according to Whipple at the Karolinska University Hospital, Stockholm, Sweden between 2008 and 2020.

### *Other Cohorts*

A local cohort of histologically confirmed PDAC cases that underwent Whipple's procedure between 2008 and 2016 has been described previously (15). This cohort was curated to remove patients overlapping with the current cohort, leaving n = 29 patients for comparison. The Cancer Genome Atlas (17) PAAD cohort was accessed via <https://portal.gdc.cancer.gov/> and curated to remove neuroendocrine tumors, leaving n = 177 cases for survival analysis. Statistical analyses were performed with GraphPad prism v9.0.0. The study was approved by the responsible ethical review boards.

### *Serial multiplex quantitative immunohistochemistry*

smq-IHC (**Figure 2**) was performed as described previously (15). Antibodies are detailed in **Table 1**. Formalin-fixed paraffin-embedded (FFPE) samples were cut to a thickness of 4  $\mu$ m and stained on an automated stainer (BOND-MAX, Leica Biosystems, Germany) as part of the diagnostic routine in a clinically accredited histology lab. Staining procedures have been described previously (15). All antibodies (**Table 1**) were extensively validated for clinical use. For all antibody stainings, at least n = 10 cases were included for the final assessment based on staining quality and availability. For all quantified stainings (**Figure 1K and L**), statistics are based on the evaluation of at least n = 15 matched mucosa/submucosa pairs.

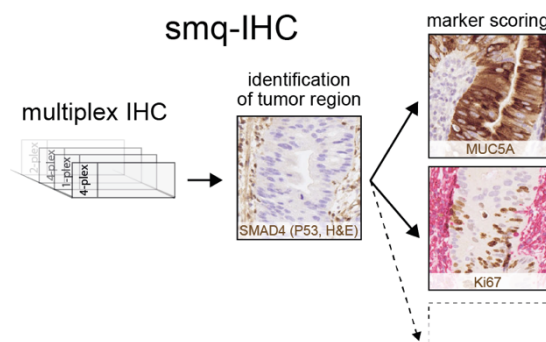

**Figure 2: Schematic of serial multiplex quantitative immunohistochemistry (smq-IHC).** Serial sections are stained with different antibody combinations. IHC of SMAD4 and p53 guides identification of tumor regions. Carefully matched regions of serial sections are evaluated, while SMAD4/p53 sections are continuously used to navigate.

| <i>antigen</i> | <i>full name</i>                          | <i>main target cell</i>                                                            | <i>clone</i> | <i>dilution</i> | <i>pretreatment</i> | <i>manufacturer, cat nr</i> |
|----------------|-------------------------------------------|------------------------------------------------------------------------------------|--------------|-----------------|---------------------|-----------------------------|
| Caldesmon      | Caldesmon                                 | Smooth muscle cells (18)                                                           | H-CD         | 1:300           | H2                  | Dako-M3557                  |
| CD146          | Cluster of differentiation 146            | <i>Lamina propria</i> stroma, pericyptal mesenchymal cells (19)                    | UMAB154      | 1:100           | H2                  | Origene-UM800051            |
| CD34           | Cluster of differentiation 34             | Fibrocytes/non-myofibroblastic stromal cells of the <i>lamina propria</i> (20, 21) | QBEnd/10     | 1:50            | H2                  | Dako-M7165                  |
| CK7            | Cytokeratin 7                             | PDAC cells (pan PDAC marker) (22)                                                  | RN7          | 1:200           | H2                  | NCL-L-CK7-560               |
| CK17           | Cytokeratin 17                            | PDAC cells (15), basal-like type (2, 3)                                            | E3           | 1:25            | H2                  | NCL-CK17                    |
| CK20           | Cytokeratin 20                            | cells with intestinal differentiation (23), classical type (2, 3)                  | PW31         | 1:25            | H2                  | NCL-L-CK20-561              |
| D2-40          | Podoplanin                                | desmoplastic stroma (24)                                                           | D2-40        | 1:50            | H2                  | Dako-M3619                  |
| vimentin       | Vimentin                                  | stromal cells, cells undergoing EMT (25, 26)                                       | V9           | 1:1500          | H1                  | Dako-M0725                  |
| MUC1           | Mucin 1                                   | PDAC cells (27)                                                                    | Ma695        | 1:50            | H1                  | NCL-MUC1                    |
| MUC2           | Mucin 2                                   | intestinal goblet cells (28), PDAC cells of classical type (2)                     | Ccp58        | 1:100           | H2                  | NCL-MUC2                    |
| MUC5AC         | Mucin 5AC                                 | PDAC cells (15), classical type (2)                                                | CLH2         | 1:50            | H2                  | NCL-MUC-5Ac                 |
| MUC6           | Mucin 6                                   | PDAC cells, pancreatic differentiation (15)                                        | CLH5         | 1:50            | H2                  | NCL-MUC-6                   |
| NGFR           | Nerve growth factor receptor (p75)        | Pancreatic stroma (29)                                                             | "Polyclonal" | 1:200           | H2                  | Atlas-HPA004765             |
| CEA(-m)        | Carcinoembryonic antigen - monoclonal     | PDAC cells (15)                                                                    | 11-7         | 1:400           | H2                  | Dako-M7072                  |
| CA125          | Cancer-antigen 125                        | PDAC cells (15)                                                                    | OV185:1      | 1:100           | H2                  | NCL-L-Ca125                 |
| CA19-9         | Cancer-antigen 19-9                       | PDAC cells (30)                                                                    | CA241:5:1:4  | 1:400           | H2                  | NCL-L-CA19-9                |
| Maspin         | Maspin                                    | PDAC cells (31)                                                                    | EAW24        | 1:50            | H2                  | NCL-Maspin                  |
| WT1            | Wilms tumor 1 (WT1 transcription factor)  | cells of the intestinal <i>lamina propria</i> (32)                                 | 6F-H2        | 1:100           | H2                  | Dako-M3561                  |
| CDX2           | caudal type homeobox 2                    | intestinal epithelial cells (33), PDAC cells of classical type (2)                 | AMT28        | 1:25            | H2                  | NCL-CDX2                    |
| p53            | tumor protein p53                         | p53 protein (34)                                                                   | Do-7         | 1:300           | H1                  | NCL-L-P53-D07               |
| Ki67           | marker of proliferation Ki-67             | proliferating cells (35)                                                           | MIB-1        | 1:150           | H2                  | Dako-M7240                  |
| SMAD4          | Mothers against decapentaplegic homolog 4 | SMAD4 protein (36)                                                                 | B-8          | 1:300           | H2                  | Santa Cruz-sc-7966          |
| Chromogranin A | Chromogranin A                            | enteroendocrine cells (37)                                                         | 5H7          | 1:100           | H1                  | NCL-CHROM-430               |

**Supplementary Table 1. Antibodies used in this study.** Pretreatment "H1": Bond Epitope Retrieval Solution 1, citrate, 20 minutes, "H2" = Bond Epitope Retrieval Solution 2, EDTA, 20 minutes; NCL: Novocastra/Leica.



## Acknowledgements

Marco Gerling's research group is supported by The Swedish Research Council, The Swedish Society for Medical Research, the Åke Wiberg Foundation, the Jeansson Foundation and the Karolinska Institute. Ingemar Ernberg's laboratory is supported by The Swedish Cancer Society. We are thankful for the support provided by the histological and immunohistochemical laboratories, Karolinska University Hospital, and to Rune Toftgård for comments on the manuscript. The results shown here are partly based upon data generated by the TCGA Research Network: <https://www.cancer.gov/tcga>.

## References

1. R. L. Siegel, K. D. Miller, A. Jemal, Cancer statistics, 2020. *CA: A Cancer Journal for Clinicians* **70**, 7–30 (2020).
2. M. Chan-Seng-Yue, *et al.*, Transcription phenotypes of pancreatic cancer are driven by genomic events during tumor evolution. *Nat Genet* **52**, 231–240 (2020).
3. R. A. Moffitt, *et al.*, Virtual microdissection identifies distinct tumor- and stroma-specific subtypes of pancreatic ductal adenocarcinoma. *Nat Genet* **47**, 1168–1178 (2015).
4. C. Maurer, *et al.*, Experimental microdissection enables functional harmonisation of pancreatic cancer subtypes. *Gut* **68**, 1034–1043 (2019).
5. P. Bailey, *et al.*, Genomic analyses identify molecular subtypes of pancreatic cancer. *Nature* **531**, 47–52 (2016).
6. F. Puleo, *et al.*, Stratification of Pancreatic Ductal Adenocarcinomas Based on Tumor and Microenvironment Features. *Gastroenterology* **155**, 1999-2013.e3 (2018).
7. S. Mueller, *et al.*, Evolutionary routes and KRAS dosage define pancreatic cancer phenotypes. *Nature* **554**, 62–68 (2018).
8. E. Sahai, *et al.*, A framework for advancing our understanding of cancer-associated fibroblasts. *Nature Reviews Cancer* **20**, 174–186 (2020).
9. M. J. Bissell, D. Radisky, Putting tumours in context. *Nature Reviews Cancer* **1**, 46–54 (2001).
10. B. L. Ricca, *et al.*, Transient external force induces phenotypic reversion of malignant epithelial structures via nitric oxide signaling. *eLife* **7**, e26161 (2018).
11. M. Ligorio, *et al.*, Stromal Microenvironment Shapes the Intratumoral Architecture of Pancreatic Cancer. *Cell* **178**, 160-175.e27 (2019).

12. C. Verbeke, Morphological heterogeneity in ductal adenocarcinoma of the pancreas – Does it matter? *Pancreatology* **16**, 295–301 (2016).
13. F. Campbell, C. S. Verbeke, *Pathology of the pancreas: a practical approach* (Springer Science & Business Media, 2013).
14. R. A. Smith, J. Tang, C. Tudur-Smith, J. P. Neoptolemos, P. Ghaneh, Meta-analysis of immunohistochemical prognostic markers in resected pancreatic cancer. *British Journal of Cancer* **104**, 1440–1451 (2011).
15. C. Fernández Moro, *et al.*, Immunohistochemical Typing of Adenocarcinomas of the Pancreatobiliary System Improves Diagnosis and Prognostic Stratification. *PLoS One* **11**, e0166067 (2016).
16. Y. Benjamini, A. M. Krieger, D. Yekutieli, Adaptive linear step-up procedures that control the false discovery rate. *Biometrika* **93**, 491–507 (2006).
17. The Cancer Genome Atlas Research Network, *et al.*, The Cancer Genome Atlas Pan-Cancer analysis project. *Nat Genet* **45**, 1113–1120 (2013).
18. R. Eves, B. A. Webb, S. Zhou, A. S. Mak, Caldesmon is an integral component of podosomes in smooth muscle cells. *Journal of Cell Science* **119**, 1691–1702 (2006).
19. M. Signore, *et al.*, Identity and ranking of colonic mesenchymal stromal cells. *J Cell Physiol* **227**, 3291–3300 (2012).
20. P. J. Barth, C. C. Westhoff, CD34+ fibrocytes: morphology, histogenesis and function. *Curr Stem Cell Res Ther* **2**, 221–227 (2007).
21. I. Stzepourginski, *et al.*, CD34+ mesenchymal cells are a major component of the intestinal stem cells niche at homeostasis and after injury. *PNAS* **114**, E506–E513 (2017).
22. J. V. Duval, L. Savas, B. F. Banner, Expression of cytokeratins 7 and 20 in carcinomas of the extrahepatic biliary tract, pancreas, and gallbladder. *Arch Pathol Lab Med* **124**, 1196–1200 (2000).
23. I. Perysinakis, *et al.*, Differential Expression of  $\beta$ -Catenin, EGFR, CK7, CK20, MUC1, MUC2, and CDX2 in Intestinal and Pancreatobiliary-Type Ampullary Carcinomas. *Int J Surg Pathol* **25**, 31–40 (2017).
24. K. Shindo, *et al.*, Podoplanin expression in cancer-associated fibroblasts enhances tumor progression of invasive ductal carcinoma of the pancreas. *Mol Cancer* **12**, 168 (2013).
25. H. Maehira, *et al.*, Vimentin Expression in Tumor Microenvironment Predicts Survival in Pancreatic Ductal Adenocarcinoma: Heterogeneity in Fibroblast Population. *Ann Surg Oncol* **26**, 4791–4804 (2019).

26. K. Vuoriluoto, *et al.*, Vimentin regulates EMT induction by Slug and oncogenic H-Ras and migration by governing Axl expression in breast cancer. *Oncogene* **30**, 1436–1448 (2010).
27. Y. Hinoda, *et al.*, Increased expression of MUC1 in advanced pancreatic cancer. *J Gastroenterol* **38**, 1162–1166 (2003).
28. T. Pelaseyed, *et al.*, The mucus and mucins of the goblet cells and enterocytes provide the first defense line of the gastrointestinal tract and interact with the immune system. *Immunol Rev* **260**, 8–20 (2014).
29. R. Xue, *et al.*, A Rising Star in Pancreatic Diseases: Pancreatic Stellate Cells. *Front Physiol* **9** (2018).
30. M. Zapata, C. Cohen, M. T. Siddiqui, Immunohistochemical expression of SMAD4, CK19, and CA19-9 in fine needle aspiration samples of pancreatic adenocarcinoma: Utility and potential role. *Cytojournal* **4**, 13 (2007).
31. J. W. Nash, A. Bhardwaj, P. Wen, W. L. Frankel, Maspin is useful in the distinction of pancreatic adenocarcinoma from chronic pancreatitis: a tissue microarray based study. *Appl Immunohistochem Mol Morphol* **15**, 59–63 (2007).
32. R. Parenti, *et al.*, Wilms' tumor 1 (WT1) protein expression in human developing tissues. *Acta Histochem* **117**, 386–396 (2015).
33. R. S. Saad, Z. Ghorab, M. A. Khalifa, M. Xu, CDX2 as a marker for intestinal differentiation: Its utility and limitations. *World J Gastrointest Surg* **3**, 159–166 (2011).
34. J. Lundin, S. Nordling, K. von Boguslawsky, P. J. Roberts, C. Haglund, Prognostic value of immunohistochemical expression of p53 in patients with pancreatic cancer. *Oncology* **53**, 104–111 (1996).
35. T. Scholzen, J. Gerdes, The Ki-67 protein: From the known and the unknown. *Journal of Cellular Physiology* **182**, 311–322 (2000).
36. M. Tascilar, *et al.*, The SMAD4 Protein and Prognosis of Pancreatic Ductal Adenocarcinoma. *Clin Cancer Res* **7**, 4115–4121 (2001).
37. D. Campana, *et al.*, Chromogranin A: Is It a Useful Marker of Neuroendocrine Tumors? *JCO* **25**, 1967–1973 (2007).
